# Supplementary material for: Global trends and prospects in health economics of robotic surgery: a bibliometric analysis
Source: PubMed Central journal article supplement — Int J Surg. 2023 Sep 14;109(12):3896–904. doi: 10.1097/JS9.0000000000000720 (PMC10720792; doi:10.1097/js9.0000000000000720), 2023-09-14
Supplement: js9-109-3896-s001.pdf [file js9-109-3896-s001.pdf]

**TITLE:**

# Global Trends and Prospects in Health Economics of Robotic Surgery: A Bibliometric Analysis

**FIRST AUTHOR:** Yihao Peng, Yuancheng Liu

## Supplemental Digital Content 1: Search strategy

**Health Economics** search terms<sup>1</sup>:

TS=(expenditure\* OR expense\* OR fund\* OR budget\* OR spend\* OR price\* OR financ\* OR cost\* OR economic\* OR macroeconomic\* OR pharmacoeconomic\* OR affordab\* OR purchas\* OR reimburse\* OR pre-pay\* OR co-pay\* OR copay\* OR insurance OR market\* OR "cost-effective\*" OR "cost-utility" OR "cost-benefit" OR "economic evaluation" OR "cost per death" OR "cost per case" OR "cost per infection" OR "cost per life" OR "cost per disability-adjusted" OR "cost per quality-adjusted" OR "cost per qaly" OR qaly OR daly OR "technology assessment" OR performance OR productiv\* OR efficien\* OR "benefit-incidence" OR "data envelopment" OR "stochastic frontier" OR malmquist OR "Pabon-Lasso" )

**Robotic surgery** search terms<sup>2</sup>:

TS=((robot\* AND \*guid\*) AND \*surg\*) or TS=((robot\* AND \*assist\*) AND \*surg\*) or TI=(robot\*AND \*surg\*)

**Search strategy:**

TS=(expenditure\* OR expense\* OR fund\* OR budget\* OR spend\* OR price\* OR financ\* OR cost\* OR economic\* OR macroeconomic\* OR pharmacoeconomic\* OR affordab\* OR purchas\* OR reimburse\* OR pre-pay\* OR co-pay\* OR copay\* OR insurance OR market\* OR "cost-effective\*" OR "cost-utility" OR "cost-benefit" OR "economic evaluation" OR "cost per death" OR "cost per case" OR "cost per infection" OR "cost per life" OR "cost per disability-adjusted" OR "cost per quality-adjusted" OR "cost per qaly" OR qaly OR daly OR "technology assessment" OR performance OR productiv\* OR efficien\* OR "benefit-incidence" OR "data envelopment" OR "stochastic frontier" OR malmquist OR "Pabon-Lasso" ) AND (TS=((robot\* AND \*guid\*) AND \*surg\*) or TS=((robot\* AND \*assist\*) AND \*surg\*) or TI=(robot\*AND \*surg\*))

## References

1. Shen LN, Wang SM, Dai W, Zhang ZG. Detecting the Interdisciplinary Nature and Topic Hotspots of Robotics in Surgery: Social Network Analysis and Bibliometric Study. *Journal of Medical Internet Research*. 2019;21(3)
2. Gheorghe A, Gad M, Ismail SA, Chalkidou K. Capacity for health economics research and practice in Jordan, Lebanon, the occupied Palestinian territories and Turkey: needs assessment and options for development. *Health Research Policy and Systems*. 2020;18(1).
