# Supplementary material for: Global trends and prospects in health economics of robotic surgery: a bibliometric analysis
Source: PubMed Central journal article supplement — Int J Surg. 2023 Sep 14;109(12):3896–904. doi: 10.1097/JS9.0000000000000720 (PMC10720792; doi:10.1097/js9.0000000000000720), 2023-09-14
Supplement: js9-109-3896-s002.pdf [file js9-109-3896-s002.pdf]

**TITLE:**

Global Trends and Prospects in Health Economics of Robotic  
Surgery: A Bibliometric Analysis

**FIRST AUTHOR:** Yihao Peng, Yuancheng Liu

**Supplemental Digital Content 2:** Figure S1-3

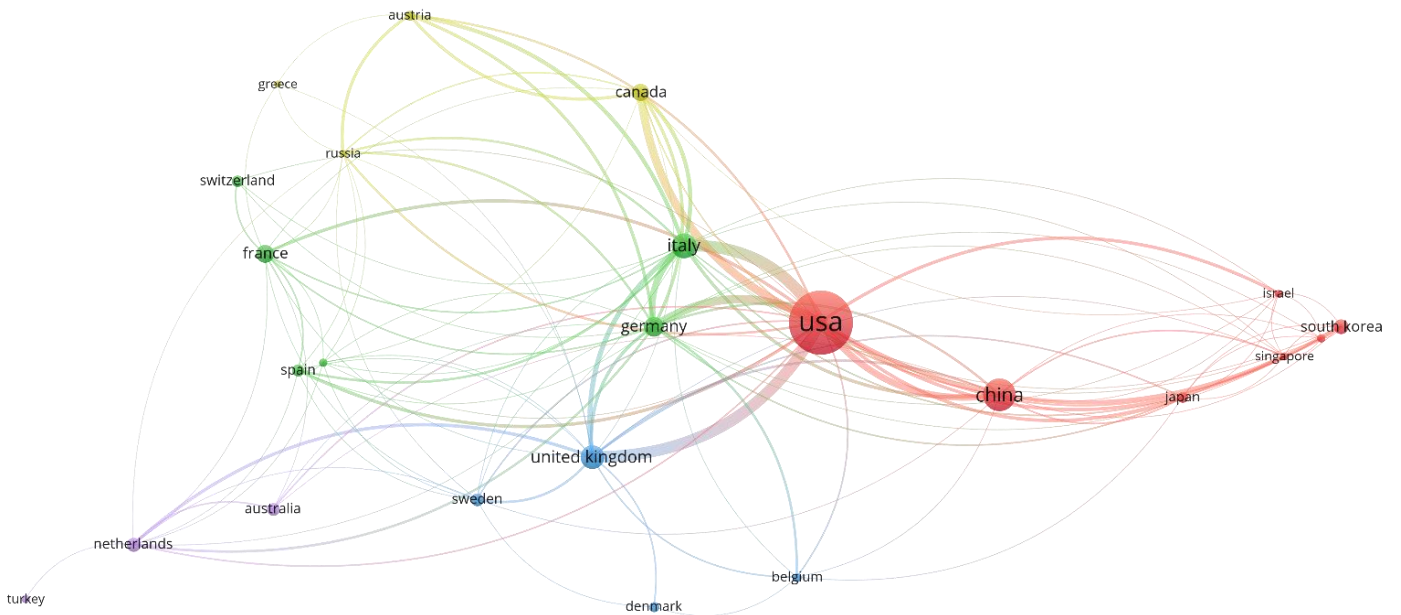

**Figure S1.** The collaborative network map of the top 24 most productive countries. Different colors are used to represent clusters of countries that are more closely related to each other than to countries in other clusters. A link between two countries indicates that researchers from those countries have co-authored papers together, with the thickness representing the frequency of collaborations.

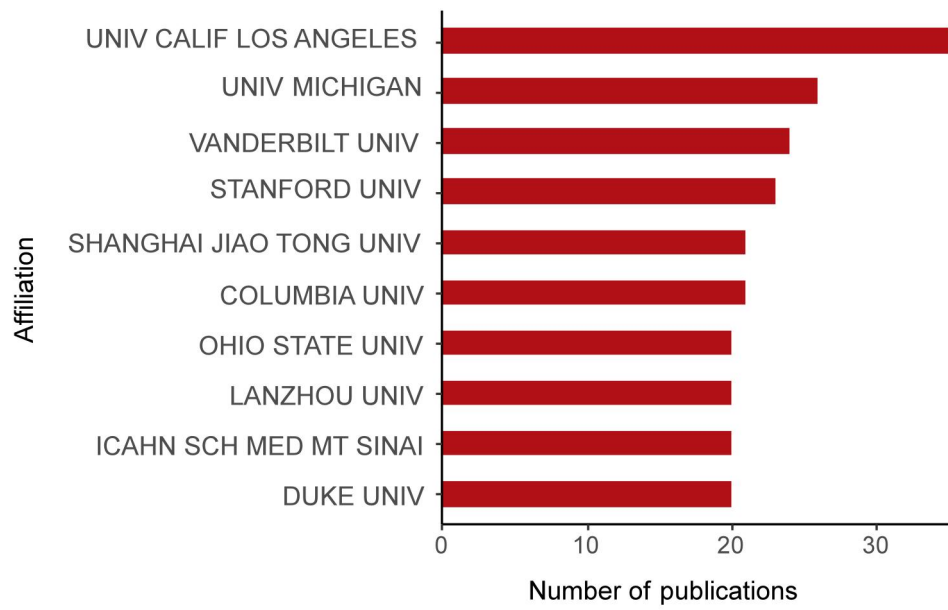

**Figure S2.** The number of indexed documents of the top 10 most productive institutes.

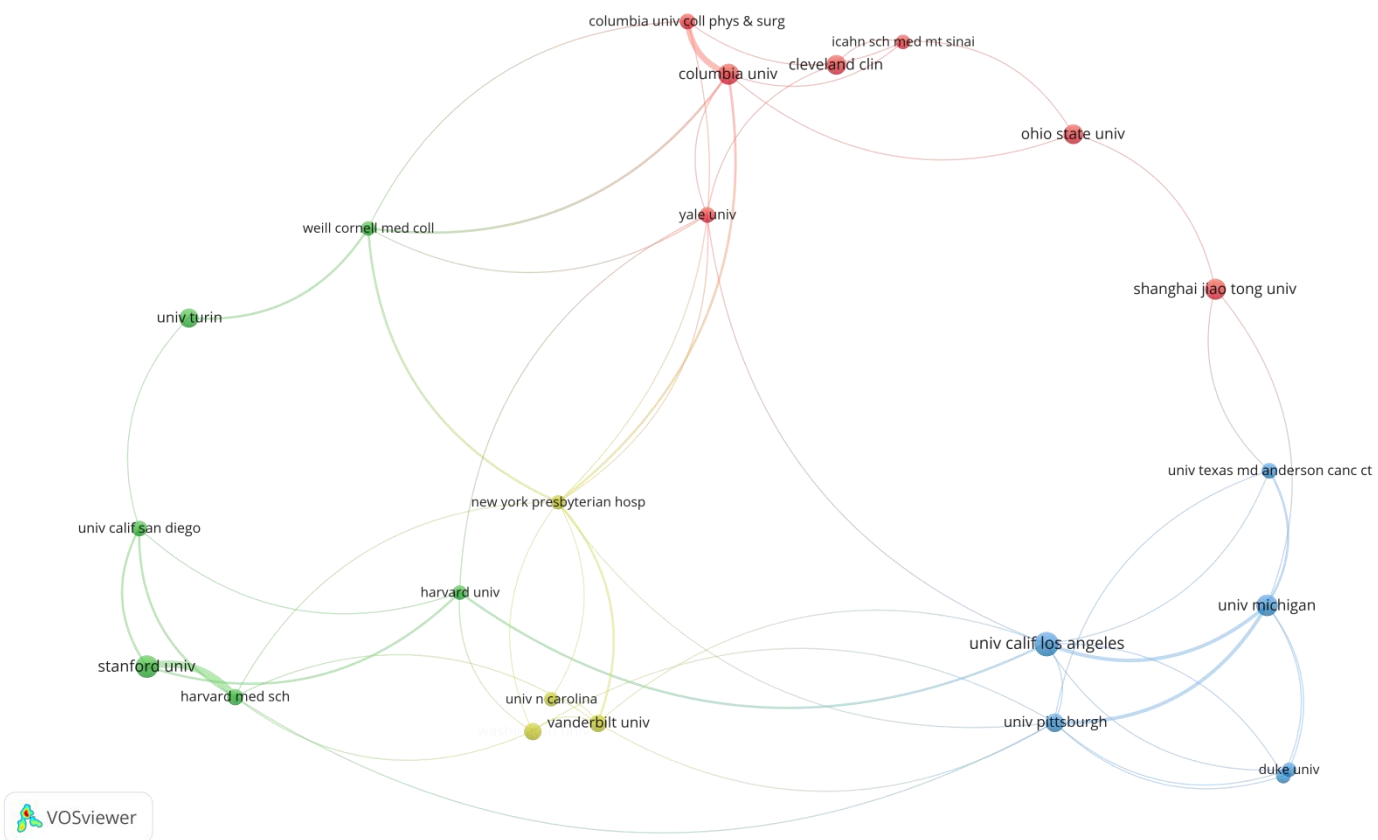

**Figure S3.** The collaborative network map of the top 23 most productive institutes. Different colors are used to represent clusters of institutes. The thickness of links represents the frequency of collaborations.
