# Supplementary material for: Global trends and prospects in health economics of robotic surgery: a bibliometric analysis
Source: PubMed Central journal article supplement — Int J Surg. 2023 Sep 14;109(12):3896–904. doi: 10.1097/JS9.0000000000000720 (PMC10720792; doi:10.1097/js9.0000000000000720), 2023-09-14
Supplement: js9-109-3896-s003.pdf [file js9-109-3896-s003.pdf]

**TITLE:**

Global Trends and Prospects in Health Economics of Robotic  
Surgery: A Bibliometric Analysis

**FIRST AUTHOR:** Yihao Peng, Yuancheng Liu

**Supplemental Digital Content 3:** study in context

To provide readers with an opportunity to thoroughly explore and gain deeper insights into the novelty of our study, we conducted a search in the Web of Science database using the following search strategy: "TS=(robot or robotic or robot-assisted or robot-enhanced) AND TS=(surgery or surgical or operation or operative) AND TS=(bibliometric or bibliometrics)." This search yielded a total of 34 documents. From these, we analyzed the content of 19 documents published within the last three years, which are summarized in the table below.

Among the 19 analyzed documents, we found that some were considered less relevant to robotic surgery. However, the remaining bibliometric analyses of robotic surgery could be categorized into three types:

- 1) studies focusing on robot-assisted surgery within specific disciplines,
- 2) studies focusing on surgical robots applied in specific disciplines
- 3) studies examining robotic surgeries in general

However, none of these studies focused on the health economics of robotic surgery, as our study does. The novelty of our study lies in being the first bibliometric analysis that specifically focuses on the health economics of robotic surgery. By analyzing global trends and prospects, our study aims to provide valuable insights for scholars working in the field of robotic surgery as well as policy makers.

| Category      | Title                                                                                                                           | Publish date | Keywords                                                                                      | Main content                                                                                                                                                                                                    | Reference |
|---------------|---------------------------------------------------------------------------------------------------------------------------------|--------------|-----------------------------------------------------------------------------------------------|-----------------------------------------------------------------------------------------------------------------------------------------------------------------------------------------------------------------|-----------|
| Less relevant | Research hotspots and trends in internal fixation of femoral neck fractures from 2010 to 2022: A 12-year bibliometric analysis. | Jun 09 2023  | none                                                                                          | This study reveals the future research focus of the internal fixation of femoral neck fractures (INFNF), providing valuable insights into future research directions and ideas for those working in this field. | <b>1</b>  |
| Less relevant | The global status and hotspots of research in the field of trans-oral endoscopic thyroidectomy (TOET) from 2008 to 2022.        | Apr 27 2023  | thyroidectomy<br>transoral<br>vestibular approach<br>research trends<br>TOET<br>bibliometrics | This study uncovers the main research topics of trans-oral endoscopic thyroidectomy (TOET), suggesting that more academics will focus on the safety of the procedure and reducing complications.                | <b>2</b>  |
| Less relevant | Evolution of Inguinal Hernia Publications: A Bibliometric Analysis from 1980 to 2021.                                           | Apr 25 2023  | bibliometrics<br>laparoscopy<br>hernia<br>femoral<br>inguinal                                 | This study analyzes the keywords in inguinal hernia publications in recent years                                                                                                                                | <b>3</b>  |
| Type 2        | Global research status and trends in orthopaedic surgical robotics: a bibliometric and visualization analysis study.            | Apr 05 2023  | bibliometrics<br>information visualization<br>orthopaedics<br>surgical robot                  | This study reveals the current status and trends of global research on orthopaedic surgical robots, providing directional guidance and                                                                          | <b>4</b>  |

|               |                                                                                                                                                               |             |                                                                                                    |                                                                                                                                                                                                                                                                                               |          |
|---------------|---------------------------------------------------------------------------------------------------------------------------------------------------------------|-------------|----------------------------------------------------------------------------------------------------|-----------------------------------------------------------------------------------------------------------------------------------------------------------------------------------------------------------------------------------------------------------------------------------------------|----------|
|               |                                                                                                                                                               |             |                                                                                                    | research ideas for further research on the technological development and clinical evaluation of orthopaedic surgical robots.                                                                                                                                                                  |          |
| Less relevant | Global productivity and research trends of colorectal carcinoma: A scientometric analysis of studies published between 1980 and 2021.                         | Feb 22 2023 | bibliometric analysis<br>colon cancer<br>colorectal cancer<br>rectal cancer<br>trends              | This study analyzes the hot topics, inter country cooperation, and citation relationships of the Colorectal Cancer (CRC), and found a significant positive correlation between the number of articles produced by the countries on CRC and gross domestic product and human development index | <b>5</b> |
| Less relevant | Clinical Application of Rapid Upper Limb Assessment and Nordic Musculoskeletal Questionnaire in Work-Related Musculoskeletal Disorders: A Bibliometric Study. | Jan 20 2023 | bibliometrics<br>citation analysis<br>top cited articles<br>work-related musculoskeletal disorders | This study identifies and describes the 50 most cited scientific articles in work related Musculoskeletal orders (WMSDs), and explores factors that contribute to making the articles influential.                                                                                            | <b>6</b> |
| Type 1        | R2 advances in robotic-assisted spine surgery: comparative analysis of                                                                                        | Dec 14 2022 | robot<br>spine<br>degenerative disease                                                             | This review examines the application of robots in spinal surgery, the publication output,                                                                                                                                                                                                     | <b>7</b> |

|               |                                                                                                                   |             |                                                                                                                                |                                                                                                                                                                                                                                                |           |
|---------------|-------------------------------------------------------------------------------------------------------------------|-------------|--------------------------------------------------------------------------------------------------------------------------------|------------------------------------------------------------------------------------------------------------------------------------------------------------------------------------------------------------------------------------------------|-----------|
|               | options, future directions, and bibliometric analysis of the literature.                                          |             | spinal surgery                                                                                                                 | surgical results, screw accuracy, and cost-effectiveness of these technologies over time.                                                                                                                                                      |           |
| Type 3        | A Bibliometric Analysis of Robotic Surgery From 2001 to 2021.                                                     | Mar 8 2022  | accuracy<br>science<br>web                                                                                                     | This study suggests that research into robotic surgery is still in its infancy with further reviews of the literature and greater output through large randomised controlled trials in multiple centres through collaborative research needed. | <b>8</b>  |
| Type 3        | Top 100 most-cited original articles, systematic reviews/meta-analyses in robotic surgery: A scientometric study. | Apr 22 2021 | robotic surgery<br>original article<br>systematic review<br>meta-analyses<br>scientometrics                                    | This study analyzes the focus of the top 100 most cited original articles, systematic reviews (SRs)/meta-analyses (MAs) in robotic surgery.                                                                                                    | <b>9</b>  |
| Less relevant | Pediatric urology research in 2020: A bibliometric analysis of the top 100 most cited articles.                   | Dec 29 2021 | pediatric urology<br>bibliometric analysis<br>top cited articles<br>transitional care<br>robotic-assisted laparoscopic surgery | This study reveals the distribution and research focus of the top-cited articles in pediatric urology.                                                                                                                                         | <b>10</b> |
| /             | Letter to the Editor Regarding "Global Research Trends in Robotic Application in                                  | Dec 15 2021 | surgery                                                                                                                        | None                                                                                                                                                                                                                                           | <b>11</b> |

Neurosurgery: A Systematic  
Bibliometric Analysis .

|               |                                                                                                              |             |                                                                                         |                                                                                                                                                                                                                                           |           |
|---------------|--------------------------------------------------------------------------------------------------------------|-------------|-----------------------------------------------------------------------------------------|-------------------------------------------------------------------------------------------------------------------------------------------------------------------------------------------------------------------------------------------|-----------|
| Type 1        | Clinical application of robotic orthopedic surgery: a bibliometric study.                                    | Nov 22 2021 | bibliometrics<br>research<br>robotic surgical procedures<br>orthopedics                 | This study summarizes the clinical research of orthopedic robots on study type, sample size, type of surgery, robot information, surgical site, most popular keywords, most cited papers, journals, authors, institutions, and countries. | <b>12</b> |
| Type 1        | Global Research Trends in Robotic Applications in Spinal Medicine: A Systematic Bibliometric Analysis.       | Sep 06 2021 | bibliometrics<br>keyword<br>research hotspots<br>robotic applications<br>spine          | This study provides a bibliometric overview of robotic applications on the spine.                                                                                                                                                         | <b>13</b> |
| Type 3        | A Bibliometric Analysis of Overall and Top 100 Most-Cited Studies About Robotic Surgery Versus Open Surgery. | Jun 30 2021 | bibliometric<br>robotic surgery                                                         | This study suggests that the lack of close cooperation among scientific research institutions may have affected the industrialization process of surgical robots.                                                                         | <b>14</b> |
| Less relevant | Bibliometric Analysis of the Top-Cited Articles on Unicompartmental Knee Arthroplasty.                       | Apr 27 2021 | unicompartmental<br>arthroplasty<br>bibliometric analysis<br>top cited articles<br>knee | This study reveals the output and citation trend, geographical distribution and research hotspots of researches on Unicompartmental Knee                                                                                                  | <b>15</b> |

|               |                                                                                                                                                  |             |                                                                                                                                                                                 |                                                                                                                                                                                                                                                                                                                            |    |
|---------------|--------------------------------------------------------------------------------------------------------------------------------------------------|-------------|---------------------------------------------------------------------------------------------------------------------------------------------------------------------------------|----------------------------------------------------------------------------------------------------------------------------------------------------------------------------------------------------------------------------------------------------------------------------------------------------------------------------|----|
| Less relevant | Research on neck dissection for oral squamous-cell carcinoma: a bibliometric analysis.                                                           | Apr 01 2021 | None                                                                                                                                                                            | Arthroplasty via analyzing the top cited articles.<br>This study assessed the development of research on neck dissection for oral squamous-cell carcinoma (OSCC) in terms of the historical evolution, current hotspots and future directions, which will assist investigators in exploring potential research directions. | 16 |
| Type 1        | A progressive scholarly acceptance analysis of robot-assisted arthroplasty: a review of the literature and prediction of future research trends. | Jan 03 2021 | robot-assisted arthroplasty<br>total hip arthroplasty<br>total knee arthroplasty<br>unicompartmental knee arthroplasty<br>progressive scholarly acceptance<br>literature review | This study analyzes all published robot assisted arthroplasty (RAA) primary studies and evaluates their acceptance as orthopedic surgical techniques.                                                                                                                                                                      | 17 |
| Less relevant | The most influential papers in mitral valve surgery; a bibliometric analysis.                                                                    | Jul 20 2020 | mitral valve<br>mitral valve replacement<br>mitral repair<br>bibliometric analysis<br>valve surgery<br>cardiac surgery<br>cardiovascular                                        | This study analyzes the top 100 cited papers relevant to mitral valve surgery, identifying the most influential papers that guide current management, the institutions that produce them and the                                                                                                                           | 18 |

|               |                                                                                                       |             |                                                                                |                                                                                                                                               |           |
|---------------|-------------------------------------------------------------------------------------------------------|-------------|--------------------------------------------------------------------------------|-----------------------------------------------------------------------------------------------------------------------------------------------|-----------|
|               |                                                                                                       |             | minimally invasive<br>percutaneous surgery<br>robotic surgery                  | authors involved.                                                                                                                             |           |
| Less relevant | Modeling the Research Landscapes of Artificial Intelligence Applications in Diabetes (GAP(RESEARCH)). | Mar 02 2020 | artificial intelligence<br>machine learning<br>diabetes<br>bibliometric<br>IDA | This research analyzes five emerging research fields of applying artificial intelligence to diagnosis, management and prediction of diabetes. | <b>19</b> |

---

## References

1. Ling W, Chen L. Research hotspots and trends in internal fixation of femoral neck fractures from 2010 to 2022: A 12-year bibliometric analysis. *Medicine*. 2023;102(23):e34003-e.
2. Li P, Qin H, Jin R, Zheng W, Fan P, Lyu P-f. The global status and hotspots of research in the field of trans-oral endoscopic thyroidectomy (TOET) from 2008 to 2022. *Frontiers in Surgery*. 2023;10.
3. Sahiner IT, Altunal C. Evolution of Inguinal Hernia Publications: A Bibliometric Analysis from 1980 to 2021. *Medical Science Monitor*. 2023;29.
4. Guo X, Wang D, Li J, Zhang H. Global research status and trends in orthopaedic surgical robotics: a bibliometric and visualisation analysis study. *Journal of Robotic Surgery*. 2023.
5. Sahiner IT, Altunal C. Global productivity and research trends of colorectal carcinoma: A scientometric analysis of studies published between 1980 and 2021. *Medicine*. 2023;102(8).
6. Kakaraparthi VN, Vishwanathan K, Gadhavi B, Reddy RS, Tedla JS, Alshahrani MS, et al. Clinical Application of Rapid Upper Limb Assessment and Nordic Musculoskeletal Questionnaire in Work-Related Musculoskeletal Disorders: A Bibliometric Study. *International journal of environmental research and public health*. 2023;20(3).
7. Mualem W, Onyedimma C, Ghaith AK, Durrani S, Jarrah R, Singh R, et al. R2 advances in robotic-assisted spine surgery: comparative analysis of options, future directions, and bibliometric analysis of the literature. *Neurosurgical Review*. 2022;46(1).
8. Musbahi A, Rao CB, Immanuel A. A Bibliometric Analysis of Robotic Surgery From 2001 to 2021. *World Journal of Surgery*. 2022;46(6):1314-24.
9. Zhang N, Yan P, Feng L, Chu X, Li J, Li J, et al. Top 100 most-cited original articles, systematic reviews/meta-analyses in robotic surgery: A scientometric study. *Asian Journal of Surgery*. 2022;45(1):8-14.
10. Ghidini F, Castagnetti M. Pediatric urology research in 2020: A bibliometric analysis of the top 100 most cited articles. *Urologia Journal*. 2022;89(3):474-80.
11. Al-Salihi MM, Ayyad A, Al-Jebur MS, Rahman MM. Letter to the Editor Regarding "Global Research Trends in Robotic Application in Neurosurgery: A Systematic Bibliometric Analysis". *World Neurosurgery*. 2022;157:244-5.
12. Li C, Wang L, Perka C, Trampuz A. Clinical application of robotic orthopedic surgery: a bibliometric study. *Bmc Musculoskeletal Disorders*. 2021;22(1).
13. Li W-S, Yan Q, Chen W-T, Li G-Y, Cong L. Global Research Trends in Robotic Applications in Spinal Medicine: A Systematic Bibliometric Analysis. *World Neurosurgery*. 2021;155:E778-E85.
14. Chu X, Yan P, Zhang N, Feng L, Guo K, Lu C, et al. A Bibliometric Analysis of Overall and Top 100 Most-Cited Studies About Robotic Surgery Versus Open Surgery. *Surgical Innovation*. 2022;29(2):203-14.
15. He J, He L, Geng B, Xia Y. Bibliometric Analysis of the Top-Cited Articles on Unicompartmental Knee Arthroplasty. *Journal of Arthroplasty*. 2021;36(5):1810-+.
16. Jiang Z, Wu C, Hu S, Liao N, Huang Y, Ding H, et al. Research on neck dissection for oral squamous-cell carcinoma: a bibliometric analysis. *International Journal of Oral Science*. 2021;13(1).
17. Misso D, Zhen E, Kelly J, Collopy D, Clark G. A progressive scholarly acceptance analysis of robot-assisted arthroplasty: a review of the literature and prediction of future research trends. *Journal of*



Robotic Surgery. 2021;15(5):813-9.

18. Allen N, O'Sullivan K, Jones JM. The most influential papers in mitral valve surgery; a bibliometric analysis. *Journal of Cardiothoracic Surgery*. 2020;15(1).

19. Giang Thu V, Bach Xuan T, McIntyre RS, Hai Quang P, Hai Thanh P, Giang Hai H, et al. Modeling the Research Landscapes of Artificial Intelligence Applications in Diabetes (GAP(RESEARCH)). *International Journal of Environmental Research and Public Health*. 2020;17(6).
